# Supplementary material
Source: ML conference proceedings conference paper supplement (https://proceedings.neurips.cc/paper_files/paper/2022/hash/fc09b26b85ab3abb2832bd555a2e4215-Abstract.html)
Supplement: Supplementary file 1 [file fc09b26b85ab3abb2832bd555a2e4215-Supplemental-Conference.zip]

Archive with 1 entries (1 files):
- appendix.pdf
